# Supplementary material for: Original positively charged nanoflakes by liquid exfoliation of layered oxybromide cobaltites
Source: Royal Society of Chemistry journal article supplement (doi:10.1039/c6ce02248k), 2016-12-01
Supplement: c6ce02248k1.pdf [file c6ce02248k1.pdf]

## SUPPORTING INFORMATIONS

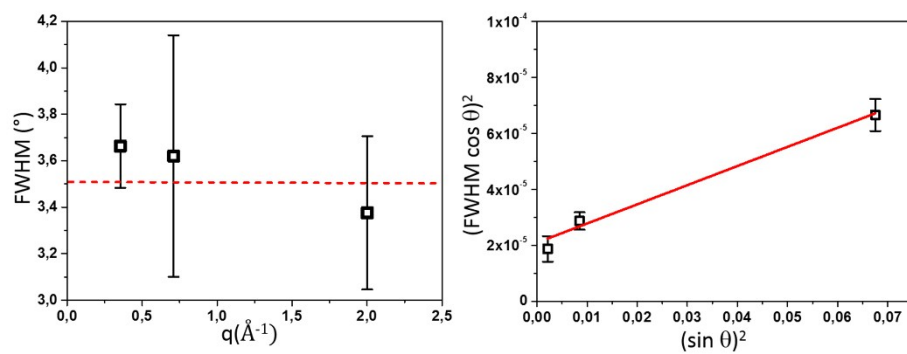

**Figure I.** (a) mosaicity determination from FWHM and  $(\beta \cos \theta)^2$  variation as a function of  $(\sin \theta)^2$  for grain size determination (b) through Williamson-Hall relation.
